# Supplementary material
Source: PubMed Central journal article supplement (PMC3578184)
Supplement: NIHMS51678-supplement-supporting_info.pdf [file NIHMS51678-supplement-supporting_info.pdf]

## SUPPLEMENTARY INFORMATION

## Supplementary Table 1

## Primary data for Figure 3a, left panel

| Assay # | MEF isolate (ID #) | Genotype               | Initial number of cells seeded | % of infected cells (GFP+) | Number of infected cells | Number of AP+ colonies | Reprogramming efficiency (% of AP+ colonies relative to infected cells) | Relative efficiency with respect to wt |
|---------|--------------------|------------------------|--------------------------------|----------------------------|--------------------------|------------------------|-------------------------------------------------------------------------|----------------------------------------|
| 1       | D1                 | wt                     | 250000                         | 40,18                      | 100450                   | 744                    | 0,74                                                                    | average of the 3 wt: 1,0               |
|         |                    | wt                     | duplicated                     |                            |                          | 804                    | 0,80                                                                    |                                        |
|         | D3                 | wt                     | 250000                         | 38,36                      | 95900                    | 688                    | 0,72                                                                    |                                        |
|         | C102               | <i>Ink4a/Arf</i> -null | 250000                         | 43,36                      | 108400                   | 6040                   | 5,57                                                                    | 7,4                                    |
|         | C101               | <i>Ink4a/Arf</i> -null | 250000                         | 40,9                       | 102250                   | 6795                   | 6,65                                                                    | 8,8                                    |
|         | F206               | <i>p53</i> -null       | 250000                         | 66,72                      | 166800                   | 2266                   | 1,36                                                                    | 1,8                                    |
|         | A10                | <i>Arf</i> -null       | 250000                         | 36,01                      | 90025                    | 5010                   | 5,57                                                                    | 7,4                                    |
|         | A9                 | <i>Arf</i> -null       | 250000                         | 35,7                       | 89250                    | 5800                   | 6,50                                                                    | 8,6                                    |
|         | K3                 | <i>p21</i> -null       | 250000                         | 47,34                      | 118350                   | 1880                   | 1,59                                                                    | 2,1                                    |
|         | K2                 | <i>p21</i> -null       | 250000                         | 36,26                      | 90650                    | 1890                   | 2,08                                                                    | 2,8                                    |
| 2       | D5                 | wt                     | 250000                         | 64,09                      | 160225                   | 428                    | 0,27                                                                    | 1,0                                    |
|         | C102               | <i>Ink4a/Arf</i> -null | 250000                         | 60,59                      | 151475                   | 6528                   | 4,31                                                                    | 16,1                                   |
|         | A10                | <i>Arf</i> -null       | 250000                         | 77,24                      | 193100                   | 3224                   | 1,67                                                                    | 6,3                                    |
|         | A9                 | <i>Arf</i> -null       | 250000                         | 62,81                      | 157025                   | 2990                   | 1,90                                                                    | 7,1                                    |
|         | 3                  | D5                     | wt                             | 250000                     | 63,32                    | 158300                 | 544                                                                     | 0,34                                   |
| C102    |                    | <i>Ink4a/Arf</i> -null | 250000                         | 53,07                      | 132675                   | 6775                   | 5,11                                                                    | 14,9                                   |
| A10     |                    | <i>Arf</i> -null       | 250000                         | 60,52                      | 151300                   | 3021                   | 2,00                                                                    | 5,8                                    |
| 4       | D2                 | wt                     | 250000                         | 9,79                       | 24475                    | 240                    | 0,98                                                                    | 1,0                                    |
|         | C40                | <i>Ink4a/Arf</i> -null | 250000                         | 13,55                      | 33875                    | 5320                   | 15,70                                                                   | 16,0                                   |
|         | C79                | <i>Ink4a/Arf</i> -null | 250000                         | 13,76                      | 34400                    | 4608                   | 13,40                                                                   | 13,7                                   |
|         | C81                | <i>Ink4a/Arf</i> -null | 250000                         | 13,4                       | 33500                    | 7742                   | 23,11                                                                   | 23,6                                   |
|         | F201               | <i>p53</i> -null       | 250000                         | 18,85                      | 47125                    | 2352                   | 4,99                                                                    | 5,1                                    |
|         | F205               | <i>p53</i> -null       | 250000                         | 16,69                      | 41725                    | 2824                   | 6,77                                                                    | 6,9                                    |
|         | F203               | <i>p53</i> -null       | 250000                         | 11,9                       | 29750                    | 2178                   | 7,32                                                                    | 7,5                                    |
|         | F192               | <i>p53</i> -null       | 250000                         | 12,3                       | 30750                    | 1835                   | 5,97                                                                    | 6,1                                    |
|         | K1                 | <i>p21</i> -null       | 250000                         | 13,39                      | 33475                    | 1864                   | 5,57                                                                    | 5,7                                    |
|         |                    | <i>p21</i> -null       | duplicated                     |                            |                          | 1380                   | 4,10                                                                    | 4,2                                    |
|         | K2                 | <i>p21</i> -null       | 250000                         | 13,64                      | 34100                    | 1006                   | 2,95                                                                    | 3,0                                    |
|         |                    | <i>p21</i> -null       | duplicated                     |                            |                          | 1506                   | 4,40                                                                    | 4,5                                    |
|         | K3                 | <i>p21</i> -null       | 250000                         | 10,02                      | 25050                    | 1298                   | 5,18                                                                    | 5,3                                    |
|         |                    | <i>p21</i> -null       | duplicated                     |                            |                          | 894                    | 3,60                                                                    | 3,6                                    |
| 5       | D5                 | wt                     | 250000                         | 64,09                      | 160225                   | 528                    | 0,33                                                                    | 1,0                                    |
|         | C102               | <i>Ink4a/Arf</i> -null | 250000                         | 60,51                      | 151275                   | 6771                   | 4,48                                                                    | 13,6                                   |
|         | A9                 | <i>Arf</i> -null       | 250000                         | 59,81                      | 149525                   | 4135                   | 2,77                                                                    | 8,4                                    |
|         | A10                | <i>Arf</i> -null       | 250000                         | 57,24                      | 143100                   | 4539                   | 3,17                                                                    | 9,6                                    |
| 6       | D4                 | wt                     | 250000                         | 50,04                      | 125100                   | 224                    | 0,18                                                                    | 1,0                                    |
|         | C81                | <i>Ink4a/Arf</i> -null | 250000                         | 58,96                      | 147400                   | 6308                   | 4,28                                                                    | 23,9                                   |
|         | C79                | <i>Ink4a/Arf</i> -null | 250000                         | 67,43                      | 168575                   | 8068                   | 4,79                                                                    | 26,7                                   |
|         | A5                 | <i>Arf</i> -null       | 250000                         | 60,56                      | 151400                   | 2808                   | 1,85                                                                    | 10,4                                   |
|         | F301               | <i>p53</i> -null       | 250000                         | 64,89                      | 162225                   | 1026                   | 0,63                                                                    | 3,5                                    |
|         | F304               | <i>p53</i> -null       | 250000                         | 70,7                       | 176750                   | 1656                   | 0,94                                                                    | 5,2                                    |

## Primary data for Figure 3a, right panel

| MEF isolate (ID #) | Genotype               | Reprogramming factors | Initial number of cells seeded | % of infected cells (GFP+) | Number of infected cells | Number of AP+ colonies | Reprogramming efficiency (% of AP+ colonies relative to infected cells) | Relative efficiency with respect to wt-3F |
|--------------------|------------------------|-----------------------|--------------------------------|----------------------------|--------------------------|------------------------|-------------------------------------------------------------------------|-------------------------------------------|
| D4                 | wt                     | 3F                    | 250000                         | 56,52                      | 141300                   | 844                    | 0,60                                                                    | average wt-3F: 1,0                        |
| D5                 | wt                     | 3F                    | 250000                         | 53,20                      | 133000                   | 630                    | 0,47                                                                    |                                           |
| D4                 | wt                     | 4F                    | 250000                         | 34,76                      | 86900                    | 1692                   | 1,95                                                                    |                                           |
| D5                 | wt                     | 4F                    | 250000                         | 30,50                      | 76250                    | 1350                   | 1,77                                                                    | 3,3                                       |
| C102               | <i>Ink4a/Arf</i> -null | 3F                    | 250000                         | 71,89                      | 179725                   | 5290                   | 2,94                                                                    | 5,5                                       |
| C101               | <i>Ink4a/Arf</i> -null | 3F                    | 250000                         | 60,50                      | 151250                   | 6000                   | 3,97                                                                    | 4,4                                       |
| C102               | <i>Ink4a/Arf</i> -null | 4F                    | 250000                         | 56,58                      | 141450                   | 4736                   | 3,35                                                                    | 6,3                                       |
| C101               | <i>Ink4a/Arf</i> -null | 4F                    | 250000                         | 45,23                      | 113075                   | 5200                   | 4,60                                                                    | 5,1                                       |

(continuation of Supplementary Table 1)

**Primary data for Figure 3b**

| Assay # | Genotype | shRNA (retroviral) | Initial number of cells seeded | Number of infected cells | Number of AP+ colonies | Reprogramming efficiency (% of AP+ colonies relative to infected cells) | Relative efficiency with respect to wt of each assay |
|---------|----------|--------------------|--------------------------------|--------------------------|------------------------|-------------------------------------------------------------------------|------------------------------------------------------|
| 1       | wt       | empty vector       | 250000                         | 44,77                    | 152                    | 0,14                                                                    | 1,0                                                  |
|         |          | shInk4a            | 250000                         | 45,00                    | 312                    | 0,28                                                                    | 2,0                                                  |
|         |          | shArf              | 250000                         | 40,00                    | 800                    | 0,80                                                                    | 5,9                                                  |
|         |          | sh(Ink4a/Arf)      | 250000                         | 48,00                    | 1590                   | 1,33                                                                    | 9,8                                                  |
| 2       | wt       | empty vector       | 250000                         | 53,41                    | 200                    | 0,15                                                                    | average wt:<br>1,0                                   |
|         |          | empty vector       | duplicated                     |                          | 279                    | 0,21                                                                    |                                                      |
|         |          | shInk4a            | 250000                         | 50,01                    | 505                    | 0,40                                                                    |                                                      |
|         |          | shInk4a            | duplicated                     |                          | 476                    | 0,38                                                                    |                                                      |
|         |          | shArf              | 250000                         | 55,27                    | 1200                   | 0,87                                                                    |                                                      |
|         |          | shArf              | duplicated                     |                          | 1432                   | 1,04                                                                    |                                                      |
|         |          | sh(Ink4a/Arf)      | 250000                         | 51,32                    | 2192                   | 1,71                                                                    |                                                      |
|         |          | sh(Ink4a/Arf)      | duplicated                     |                          | 2314                   | 1,80                                                                    |                                                      |

**Primary data for Figure 3g**

| Human diploid fibroblasts | Reprogramming factors | shRNA (retroviral) | Initial number of cells seeded | % of infected cells (GFP+) | Number of infected cells | Number of AP+ colonies | Reprogramming efficiency (% of AP+ colonies relative to infected cells) | Relative efficiency with respect to wt |
|---------------------------|-----------------------|--------------------|--------------------------------|----------------------------|--------------------------|------------------------|-------------------------------------------------------------------------|----------------------------------------|
| IMR90/TERT                | 3F                    | none               | 200000                         | 14,00                      | 28000                    | 239                    | 0,85                                                                    | average no-sh:<br>1,0                  |
|                           |                       | none               | duplicated                     |                            |                          | 188                    | 0,67                                                                    |                                        |
|                           |                       | shINK4a            | 200000                         | 15,00                      | 30000                    | 465                    | 1,55                                                                    |                                        |
|                           |                       | shINK4a            | duplicated                     |                            |                          | 500                    | 1,67                                                                    |                                        |
|                           |                       | shARF              | 200000                         | 13,00                      | 26000                    | 190                    | 0,73                                                                    |                                        |
|                           |                       | shARF              | duplicated                     |                            |                          | 169                    | 0,65                                                                    |                                        |
|                           | 4F                    | none               | 200000                         | 14,00                      | 28000                    | 130                    | 0,46                                                                    | average no-sh:<br>1,0                  |
|                           |                       | none               | duplicated                     |                            |                          | 145                    | 0,52                                                                    |                                        |
|                           |                       | shINK4a            | 200000                         | 4,26                       | 8520                     | 240                    | 2,82                                                                    |                                        |
|                           |                       | shINK4a            | duplicated                     |                            |                          | 270                    | 3,17                                                                    |                                        |
|                           |                       | shARF              | 200000                         | 9,26                       | 18520                    | 113                    | 0,61                                                                    |                                        |
|                           |                       | shARF              | duplicated                     |                            |                          | 140                    | 0,76                                                                    |                                        |

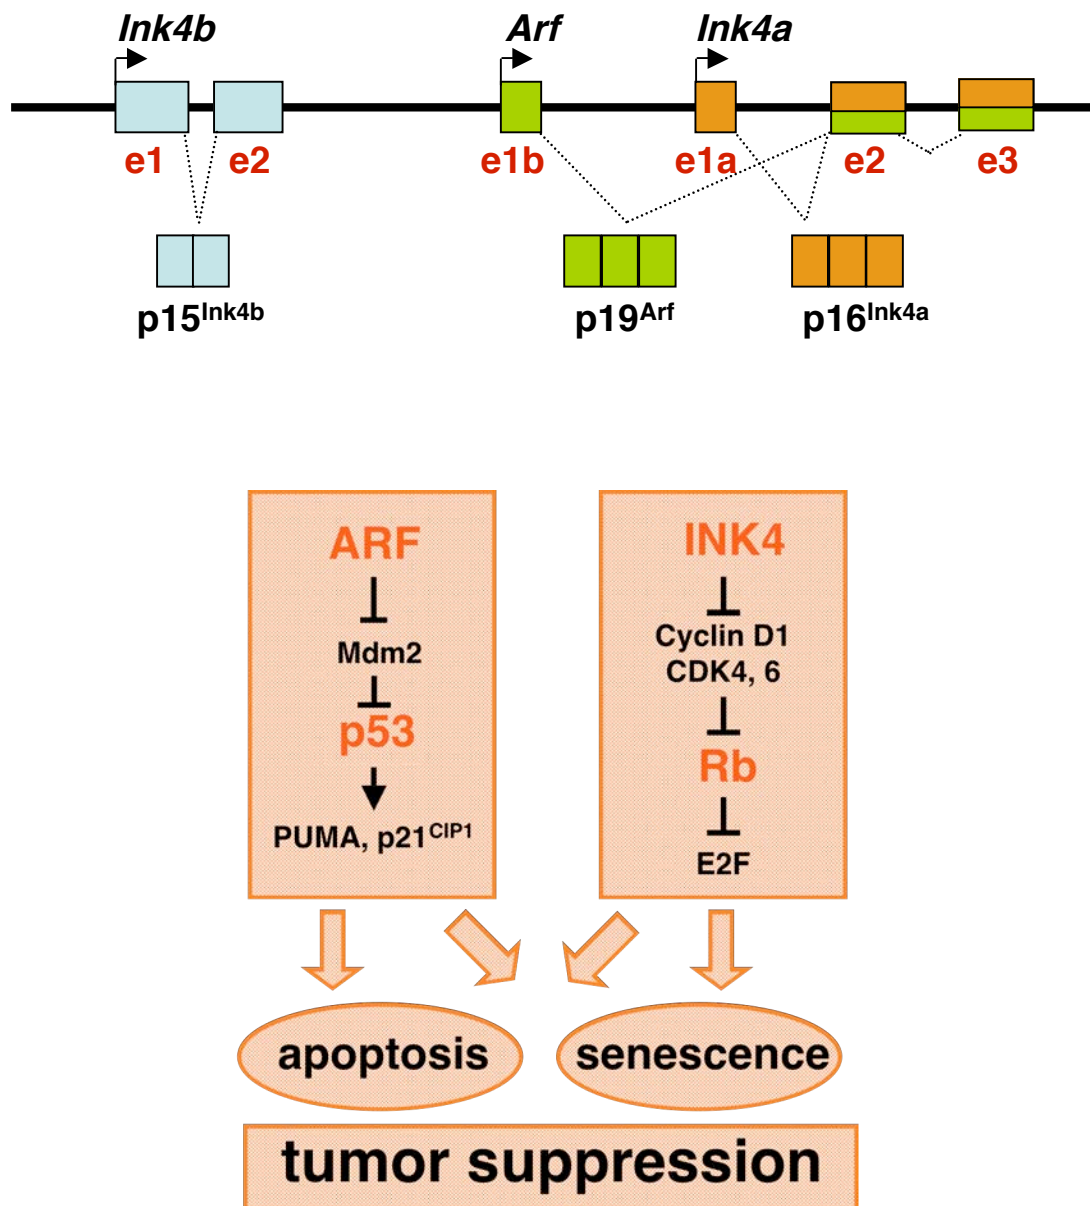

Supplementary Figure 1. Structure of the *Ink4/Arf* locus and its role in the regulation of the p53 and Rb pathways.

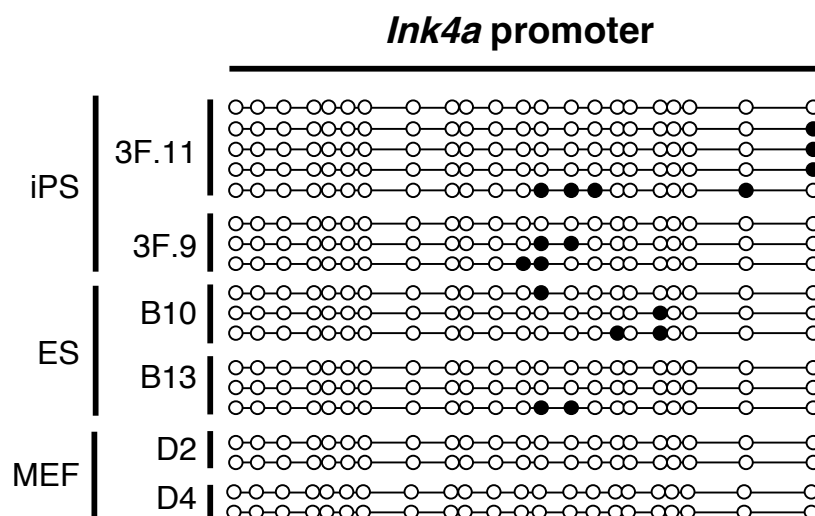

**Supplementary Figure 2. Absence of DNA methylation at the *Ink4a* promoter in iPS cells.**

DNA methylation analysis of the *Ink4a* promoter in the indicated cells. Methylation was analyzed using the standard bisulfite sequencing method. Each line represents a single clone. Dark dots indicate methylation.

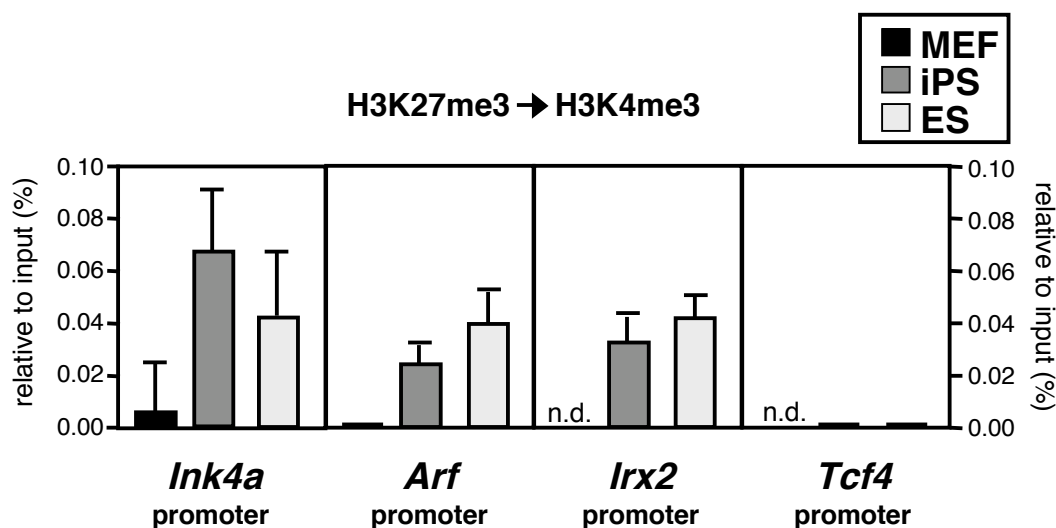

**Supplementary Figure 3. Sequential ChIP to detect bivalent chromatin.**

Sequential ChIP, first of H3K27me3 and then of H3K4me3, of the indicated promoters. The data for the *Ink4a* and *Arf* promoters are the same as in Fig. 1b of the main paper. The *Irx2* promoter is shown as a positive control for bivalent chromatin, and the *Tcf4* promoter as a negative control. Not determined, n.d.

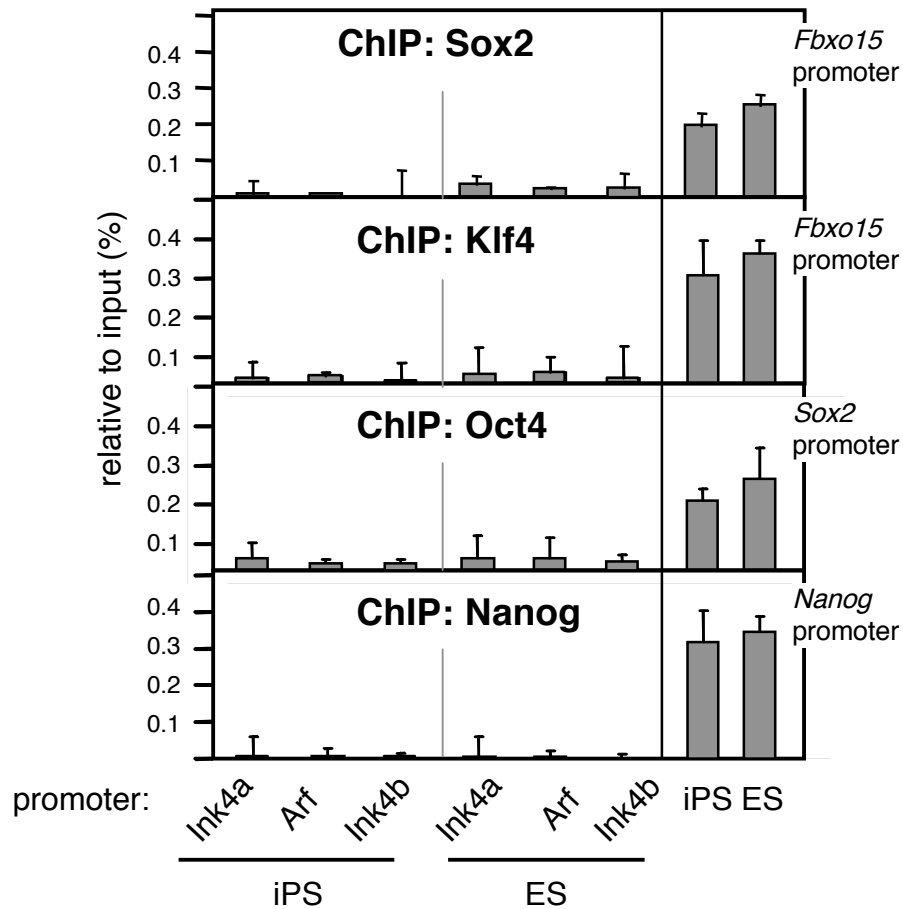

**Supplementary Figure 4. Lack of binding of the reprogramming factors to the promoters of the *Ink4/Arf* locus.**

Chromatin immunoprecipitation assays using specific antibodies against Sox2, Klf4, Oct4 and Nanog were performed on iPS or ES cells followed by qRT-PCR with specific primers to detect the promoter regions of *Ink4a*, *Arf* and *Ink4b*. Primers amplifying the promoter regions of *Fbxo15*, *Sox2*, and *Nanog* genes were used as positive controls.

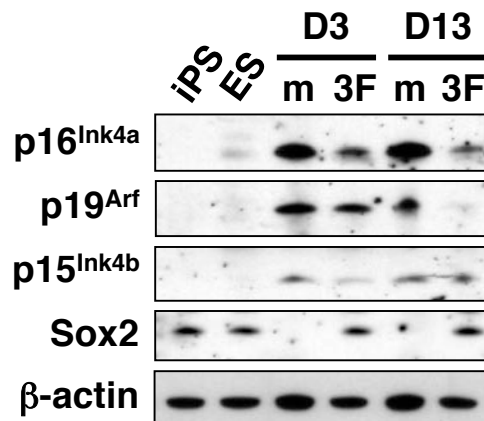

**Supplementary Figure 5. Silencing of the *Ink4/Arf* locus during reprogramming.**

Western-blot analysis of the indicated proteins at days 3 (D3) and 13 (D13) during 3F-reprogramming compared to mock-infected cells (m).

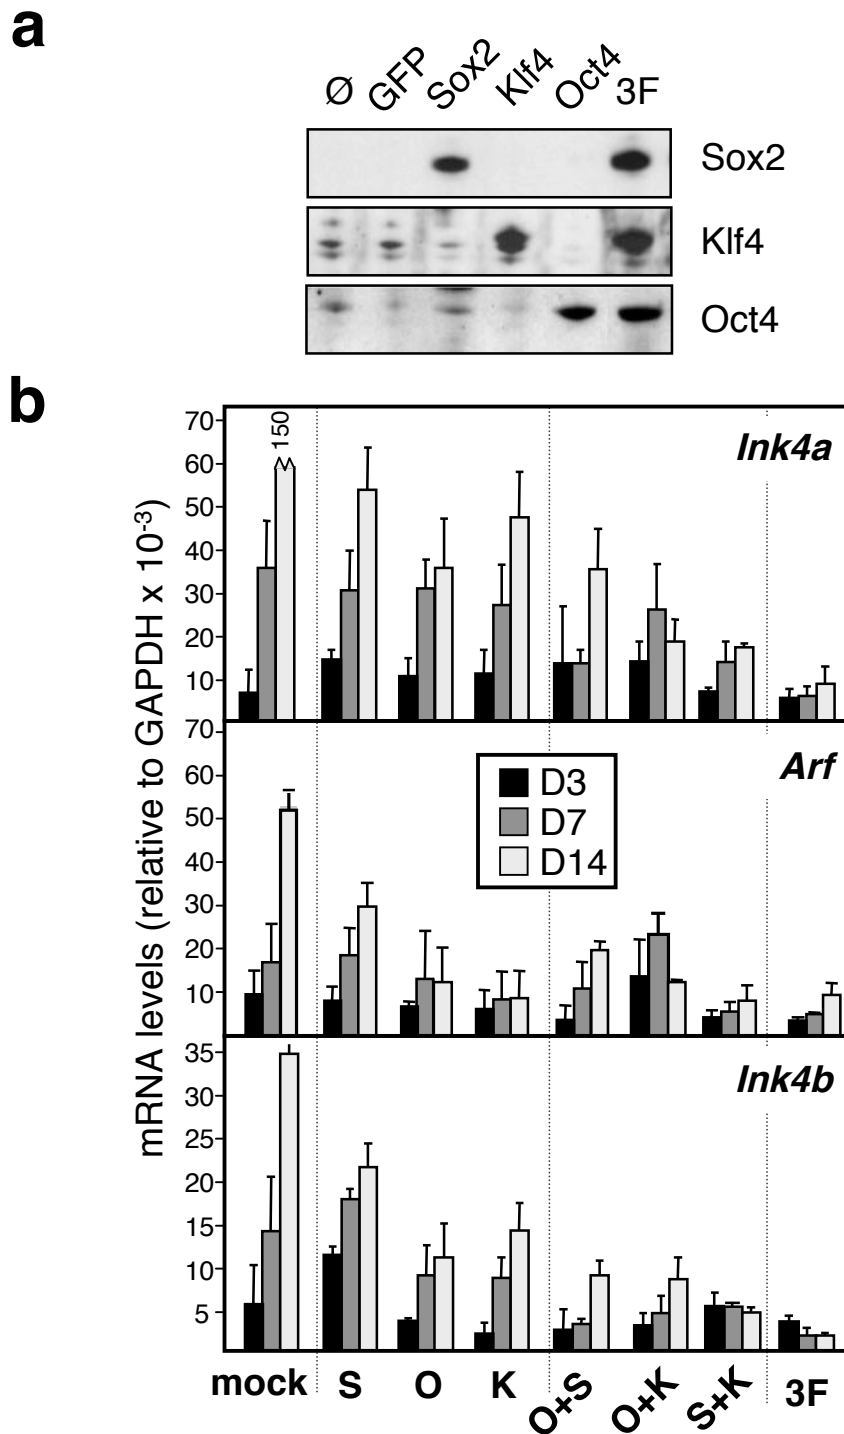

**Supplementary Figure 6. Repression of the *Ink4/Arf* locus requires the 3F.**

**a.** Confirmation of expression of Sox2, Klf4 and Oct4 in primary wild-type MEFs retrovirally-infected with the indicated reprogramming factors and analyzed 2 days after. **b.** Expression of the *Ink4/Arf* locus, at the indicated days, in MEF cultures retrovirally infected as follows: mock; S, Sox2; O, Oct4; K, Klf4; or 3F.

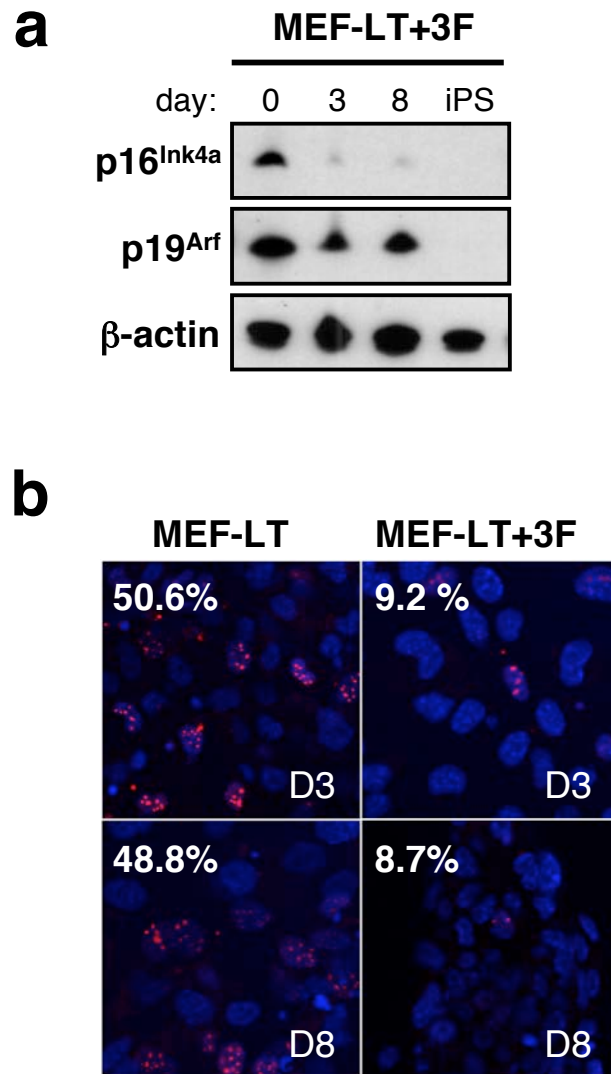

**Supplementary Figure 7. Silencing of the *Ink4a/Arf* locus in MEFs expressing large-T (MEF-LT) during reprogramming.**

**a.** Western-blot analysis. **b.** Immunofluorescence analysis of p19<sup>Arf</sup> at days 3 (D3) and 8 (D8). The percentage of p19<sup>Arf</sup> positive cells is shown in the upper left corner of each panel.

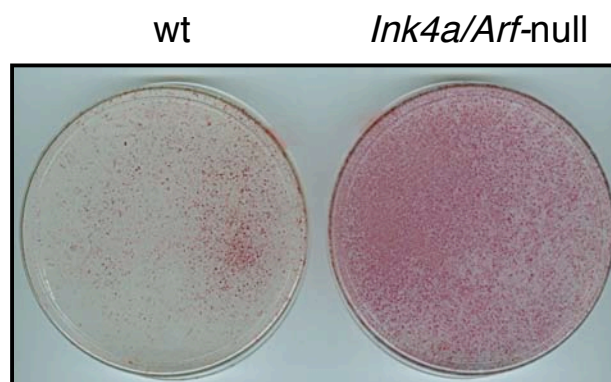

**Supplementary Figure 8. Representative photograph of reprogramming plates.** MEFs ( $2.5 \times 10^5$  cells) of the indicated genotype were subjected to the reprogramming protocol and plates were stained at day 14 (see Fig. 2a) with alkaline phosphatase.

| clone    | genotype               | metaphases analyzed | euploid metaphases (% with 40 chrom.) |
|----------|------------------------|---------------------|---------------------------------------|
| 3F-7     | wt                     | 30                  | 90%                                   |
| 3F-9     | wt                     | 10                  | 100%                                  |
| F206-21  | <i>p53</i> -null       | 10                  | 100%                                  |
| F206-22  | <i>p53</i> -null       | 30                  | 90%                                   |
| K2-21    | <i>p21</i> -null       | 10                  | 100%                                  |
| C101.2-4 | <i>Ink4a/Arf</i> -null | 20                  | 75%                                   |
| C101.2-5 | <i>Ink4a/Arf</i> -null | 20                  | 80%                                   |
| C101.2-6 | <i>Ink4a/Arf</i> -null | 20                  | 70%                                   |
| C101.2-7 | <i>Ink4a/Arf</i> -null | 13                  | 77%                                   |
| C102.2-4 | <i>Ink4a/Arf</i> -null | 10                  | 100%                                  |
| C102.2-5 | <i>Ink4a/Arf</i> -null | 20                  | 80%                                   |

**Supplementary Figure 9. Analysis of euploidy in iPS clones.**



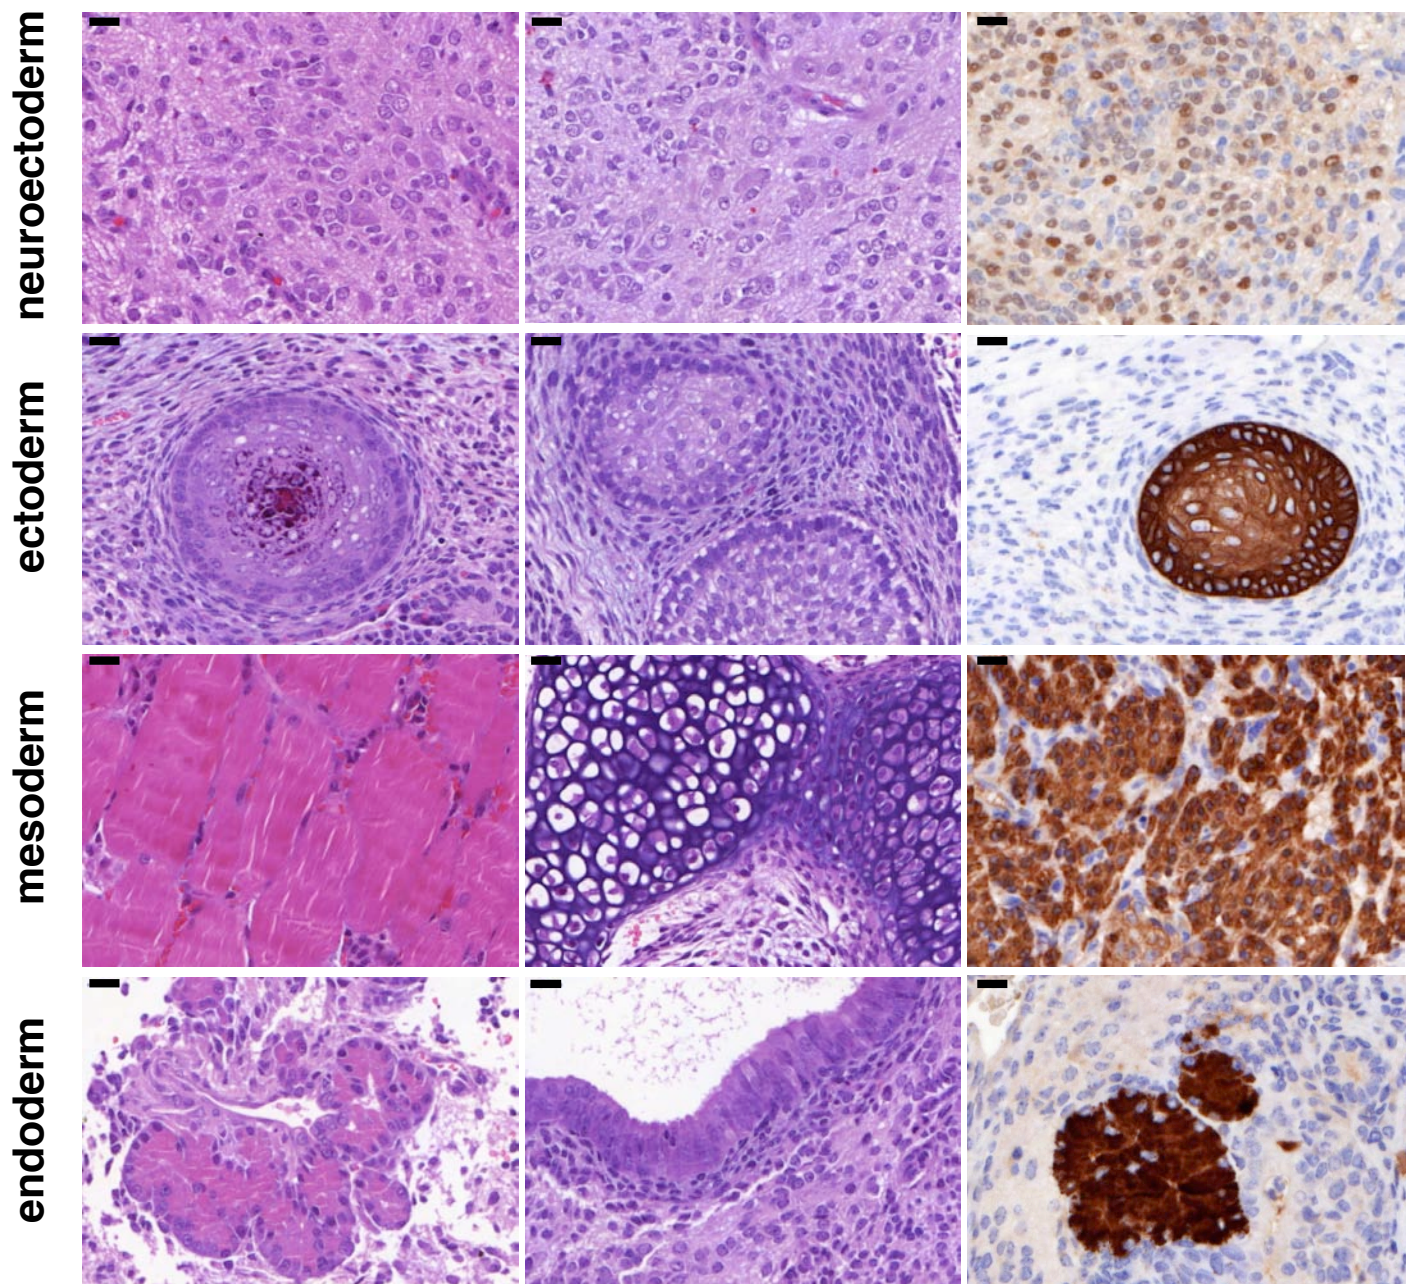

### Supplementary Figure 10. Teratoma formation by *Ink4/Arf*-null iPS.

A total of 4 *Ink4a/Arf*-null (3F) iPS injections produced correspondingly 4 teratomas each (see Methods). Histological analysis of haematoxylin and eosin stained sections revealed features of (from top to bottom): neuroectoderm (neural tissues, left and middle panels); ectoderm (hair follicle and epidermal tissue, left and middle panels respectively); mesoderm (striated muscle and cartilage, left and middle panels respectively); endoderm (pancreatic acini and duct-like structures and pseudostratified ciliated epithelium, left and middle panels respectively). Immunohistochemical stainings confirmed the pathological analyses, in particular (right column, from top to bottom) anti-neuronal nuclei (NeuN, MAB377, Chemicon), cytokeratin-19 (CK-19, Dev. Stu. Hybridoma Bank), common-muscle actin (HHF-35, M0635, Dak o), and chymotrypsin (2100-0657, Serotec). Scale bar shown on the upper left corner: 20  $\mu$ m.

| Microinjection in B6- <i>Tyr<sup>C-2J</sup></i> blastocysts |                        |                      |                |           |                                |
|-------------------------------------------------------------|------------------------|----------------------|----------------|-----------|--------------------------------|
| iPS clone                                                   | Genotype               | Blastocysts injected | Cells injected | Pups born | Chimeras Sex (% pigmentation)* |
| <b>3F-7</b>                                                 | WT                     | 52                   | 5-8            | 5         | 1M(100%)                       |
| <b>3F-9</b>                                                 | WT                     | 43                   | 5-8            | 4         | 1F(60%)                        |
| <b>4F-4</b>                                                 | WT                     | 58                   | 5-6            | 8         | 2M (80%), 1F(100%)             |
| <b>F206.21</b>                                              | <i>p53</i> -null       | 52                   | 5-6            | 7         | 1M(60%), 1M(30%)               |
| <b>C101.2-4</b>                                             | <i>Ink4a/Arf</i> -null | 33                   | 5-7            | 5         | 1F(70%)                        |
| <b>C101.2-7</b>                                             | <i>Ink4a/Arf</i> -null | 22                   | 5-7            | 5         | 0                              |

\* red indicates that there was germline transmission

| Aggregation with CD1 morulae |                        |                    |                  |           |                                      |
|------------------------------|------------------------|--------------------|------------------|-----------|--------------------------------------|
| iPS clone                    | Genotype               | Morulae aggregated | Cells aggregated | Pups born | Chimeras Sex (% pigmentation)        |
| <b>4F-3</b>                  | WT                     | 171                | 4-8              | 15        | 1M(30%), 1M(5%)<br>1F (50%), 2F(30%) |
| <b>old-MSF.1385</b>          | WT                     | 235                | 4-12             | 13        | 1M(40%), 1F(60%)                     |
| <b>C101.2-4</b>              | <i>Ink4a/Arf</i> -null | 102                | 4-15             | 12        | 0                                    |
| <b>C101.2-7</b>              | <i>Ink4a/Arf</i> -null | 72                 | 4-15             | 17        | 0                                    |
| <b>C102.2-4</b>              | <i>Ink4a/Arf</i> -null | 94                 | 4-15             | 22        | 1M(100%), 1M(50%),<br>1F(50%)        |

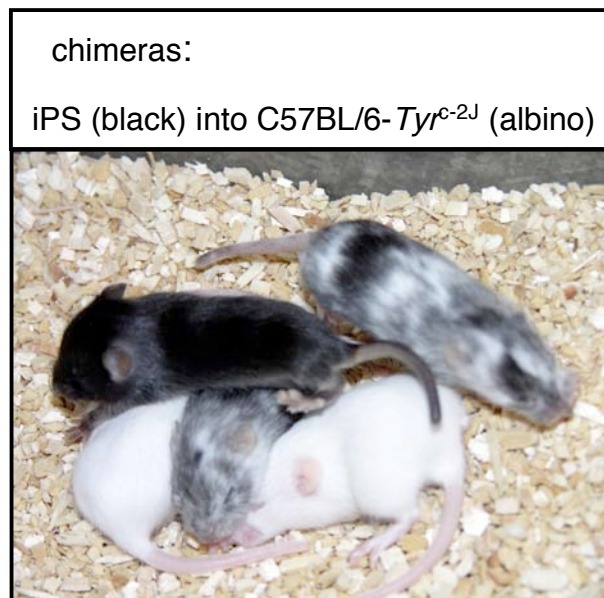

Supplementary Figure 11. Generation of chimeras from *Ink4a/Arf*-null iPS.

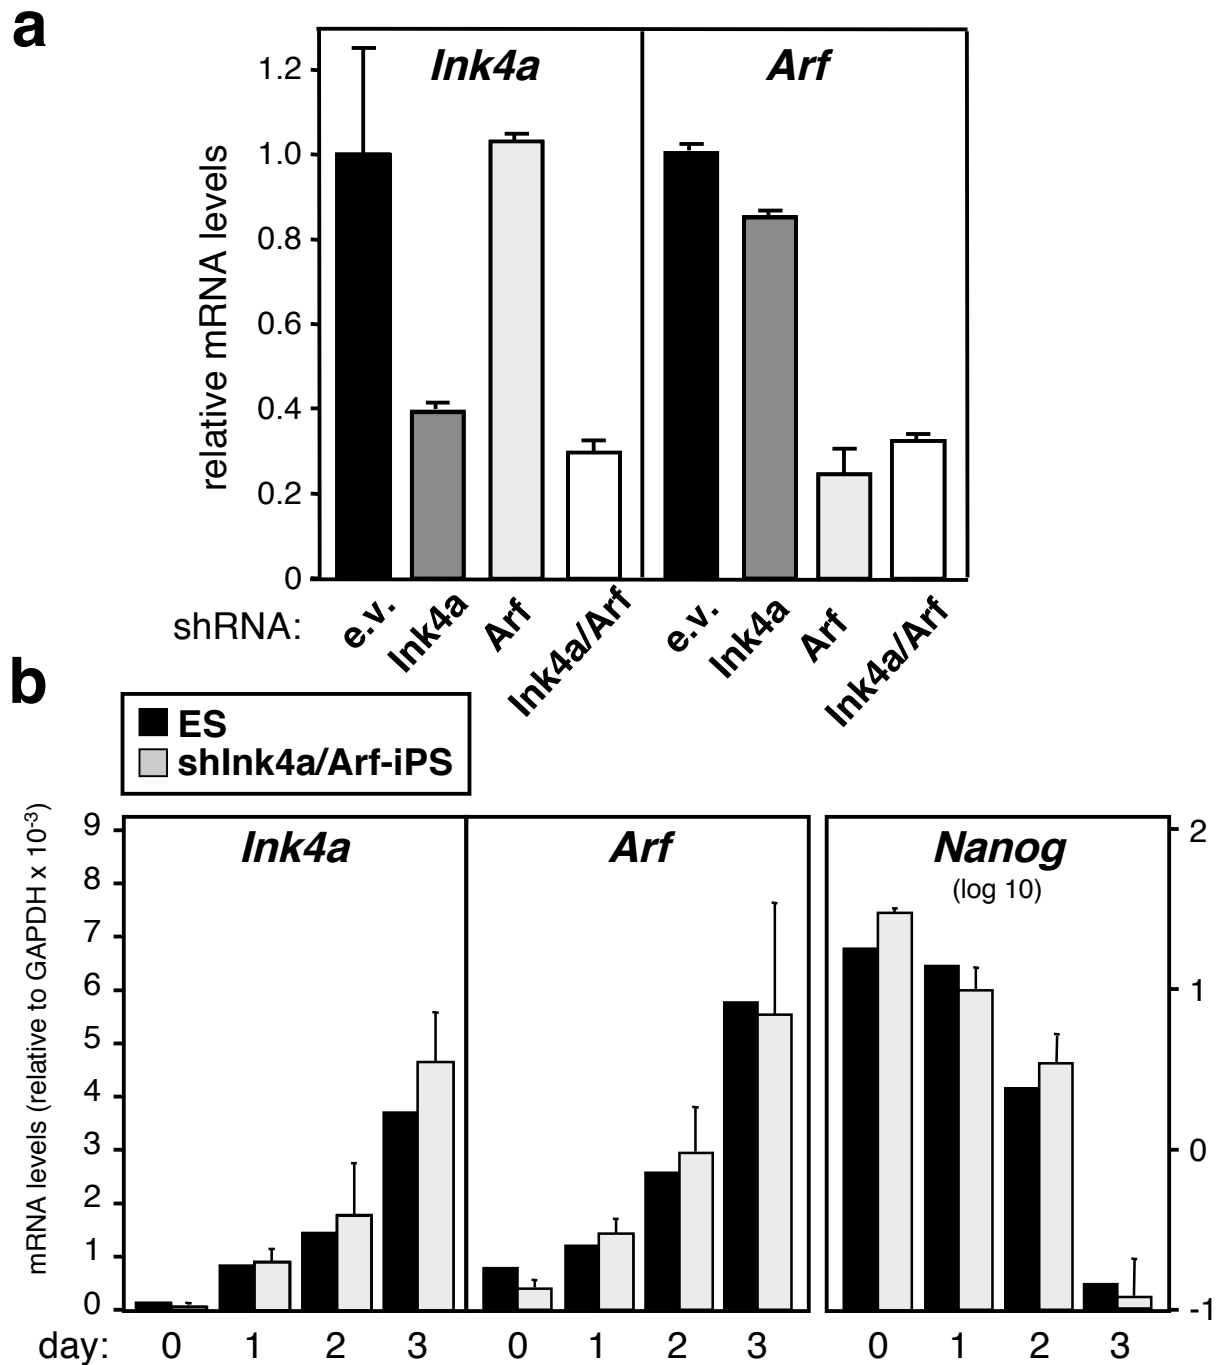

**Supplementary Figure 12. Analysis of the *Ink4/Arf* locus activity on iPS after transient knockdown of the locus.**

**a.** Expression levels of *Ink4a* and *Arf* in MEFs, 48 h after infection with retroviruses expressing shRNAs targeted to *Ink4a*, *Arf* or both *Ink4a/Arf* as measured by quantitative RT-PCR. Empty vector is shown as reference. **b.** Retinoic acid differentiation of iPS cells generated after knockdown of *Ink4a/Arf* showing the increase in expression of *Ink4a* and *Arf* at the indicated days post retinoic acid withdrawal. *Nanog* expression in the same experimental setting is shown as a control of differentiation. Data correspond to the average  $\pm$  s.d. of 3 independent assays, using different isolates of iPS clones.

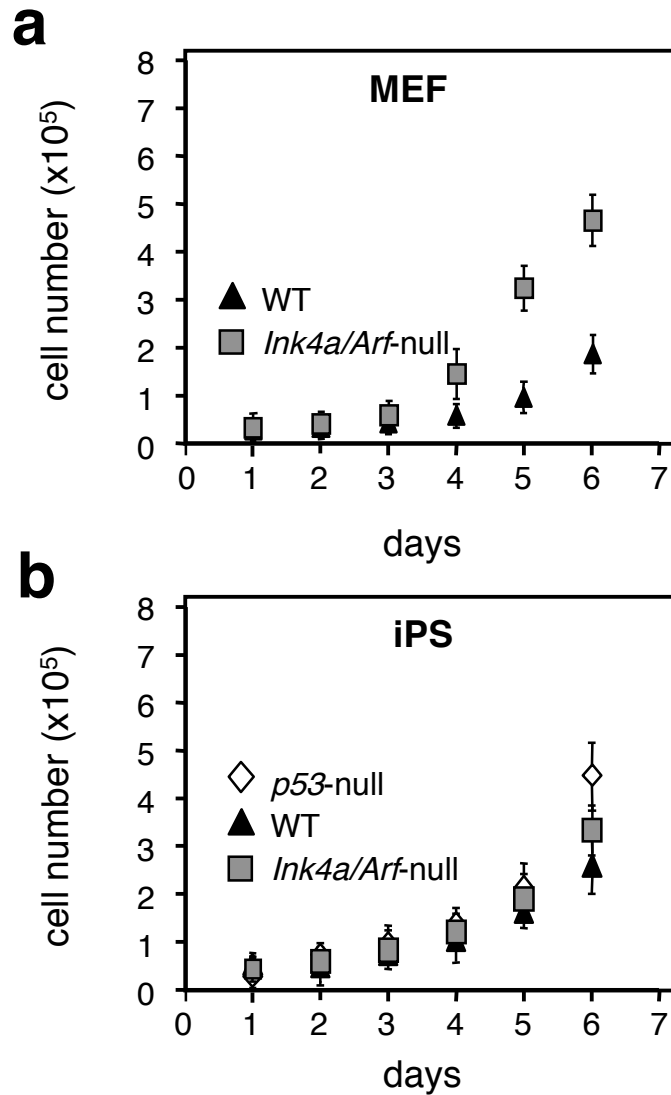

**Supplementary Figure 13. Proliferation rate of MEFs and iPS cells.**

**a.** MEFs ( $2.5 \times 10^4$ ) of the indicated genotypes were seeded and counted at the indicated days using trypan blue exclusion to identify live cells. **b.** iPS cells ( $10^4$ ) of the indicated genotype were seeded on 24 well plate coated with gelatin. Cell number was counted daily two days after seeding for 6 days and live cells were determined by trypan blue exclusion. Data correspond to the average  $\pm$  s.d. of 2 independent assays using 2 different MEF or iPS isolates each.

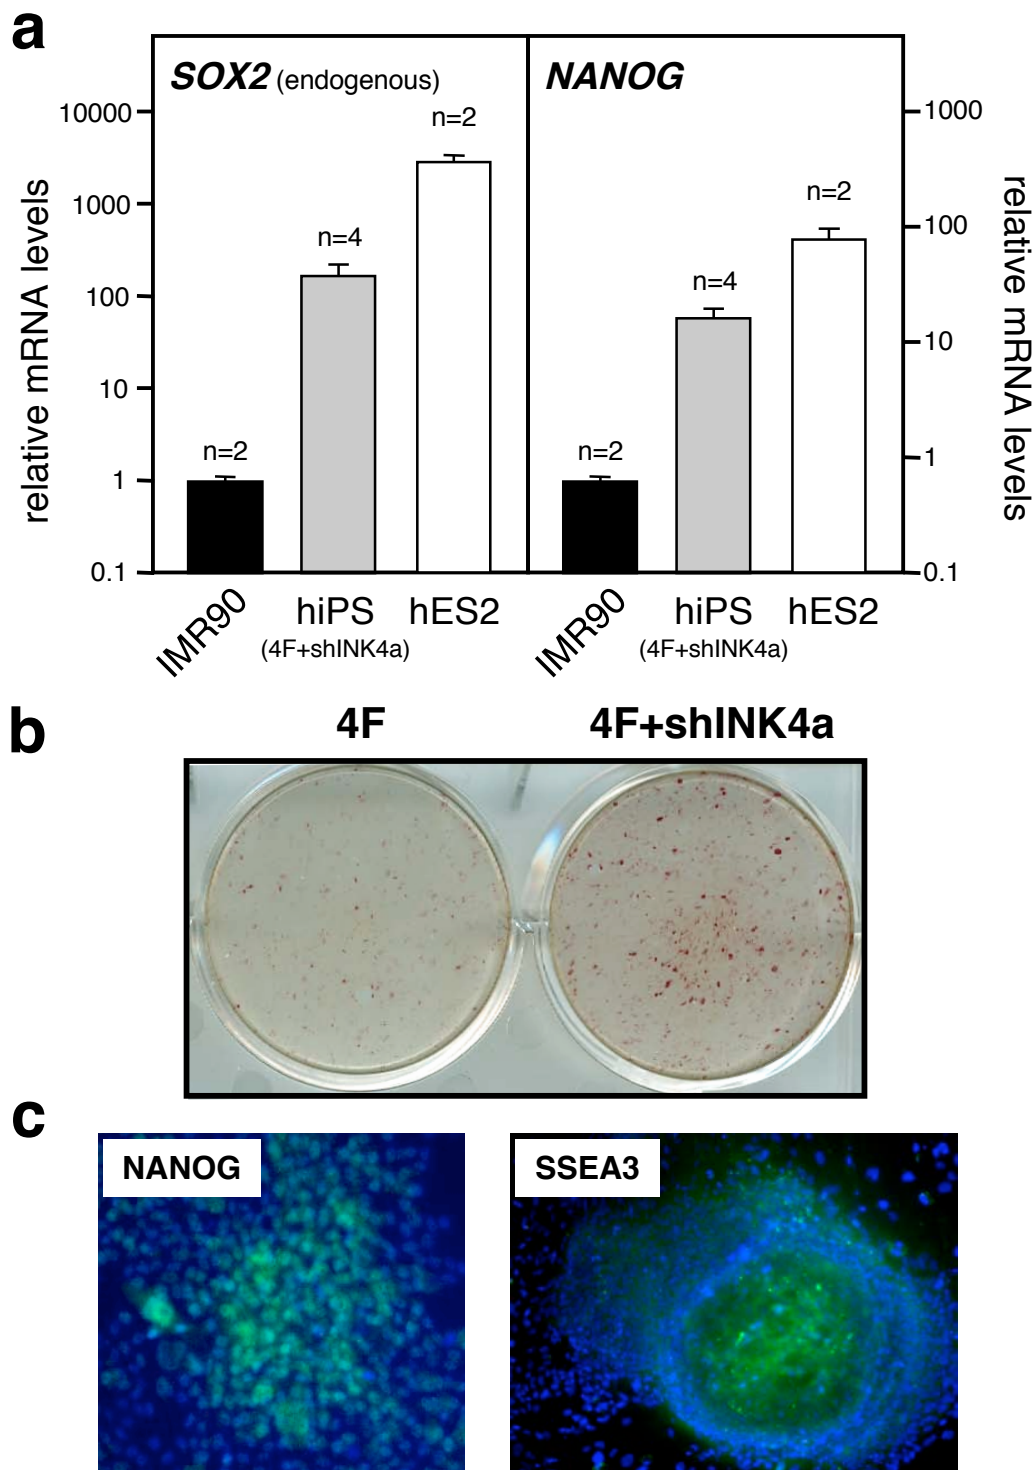

**Supplementary Figure 14. Characterization of human shINK4a-iPS.**

**a.** Expression of endogenous *SOX2* and *NANOG* in human shINK4a-iPS (4F) compared with the parental IMR90/TERT fibroblasts and with human ES cell line hES2 (NIH code ES02) measured by quantitative RT-PCR. Data correspond to the average  $\pm$  s.d. of 3 independent assays, using different hiPS clones. **b.** Reprogramming plates of IMR90/TERT cells stained with alkaline phosphatase. **c.** Immunostaining of human shINK4a-iPS (4F) iPS colonies with antibodies for NANOG and SSEA3.

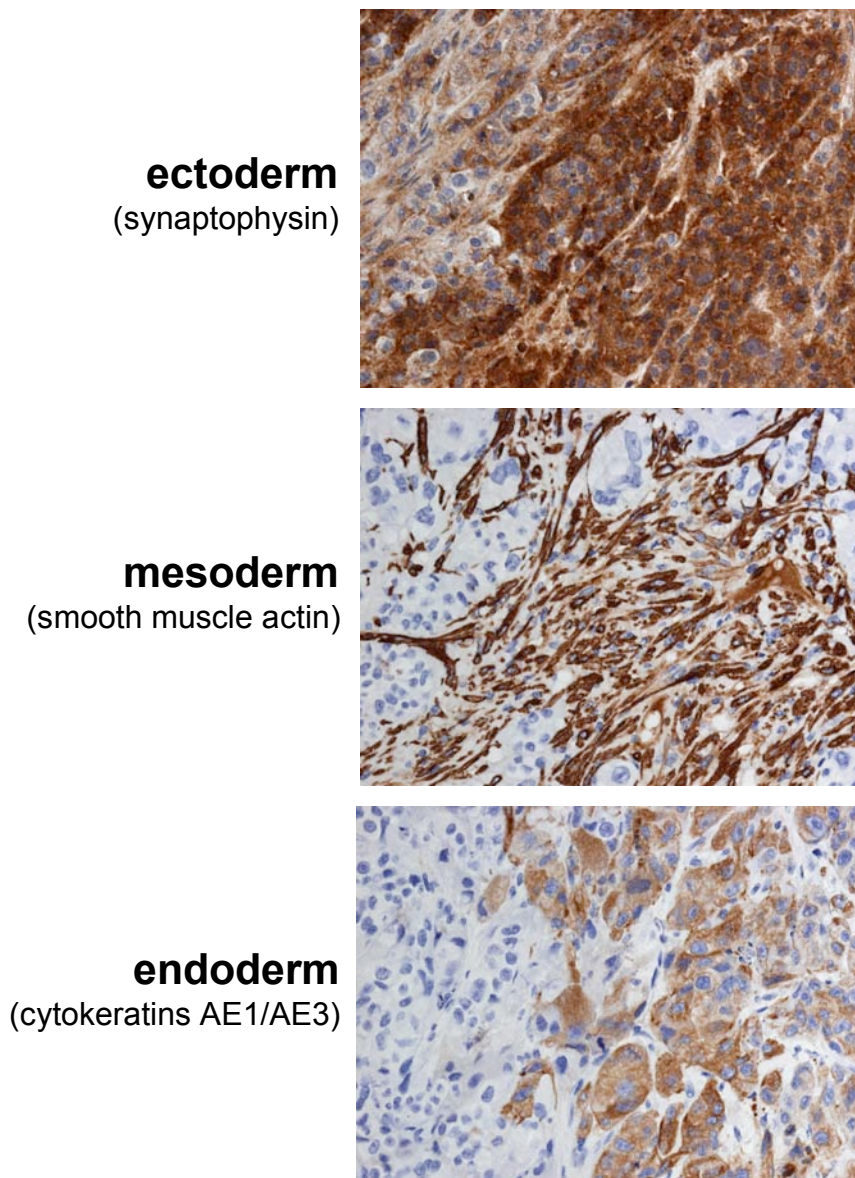

**Supplementary Figure 15. Teratoma formation by human shINK4a-iPS**

Human iPS cells ( $2 \times 10^6$  cells) derived from IMR90/TERT fibroblasts reprogrammed with 4F+shINK4a were subcutaneously injected into irradiated (400-rad) nude mice. Tumors were formed in all cases. After 9 weeks, tumors were surgically removed, fixed in formalin at 4°C, embedded in paraffin wax, and sectioned at a thickness of 5  $\mu\text{m}$ . Sections were stained with hematoxylin and eosin for pathological examination or processed for immunohistochemical analysis using antibodies against synaptophysin (SY38, Dako, as ectoderm marker), smooth muscle actin (SMA, 1A4, Dako, as mesoderm marker) and cytokeratins (AE1/AE3, Dako, as endoderm marker).
